# Supplementary material
Source: PubMed Central journal article supplement (PMC7489877)
Supplement: mmc1.pdf [file mmc1.pdf]

## Supplemental information

### Mapping Systemic Inflammation and Antibody Responses in Multisystem Inflammatory Syndrome in Children (MIS-C)

Conor N. Gruber, Roosheel S. Patel, Rebecca Trachtman, Lauren Lepow, Fatima Amanat, Florian Krammer, Karen M. Wilson, Kenan Onel, Daniel Geanon, Kevin Tuballes, Manishkumar Patel, Konstantinos Mouskas, Timothy O'Donnell, Elliot Merritt, Nicole W. Simons, Vanessa Barcessat, Diane M. Del Valle, Samantha Udondem, Gulpawan Kang, Charuta Agashe, Neha Karekar, Joanna Grabowska, Kai Nie, Jessica Le Berichel, Hui Xie, Noam Beckmann, Sandeep Gangadharan, George Ofori-Amanfo, Uri Laserson, Adeeb Rahman, Seunghee Kim-Schulze, Alexander W. Charney, Sacha Gnjatic, Bruce D. Gelb, Miriam Merad, and Dusan Bogunovic

| Diagnostic Criteria                                                                                                                                                                                                                                                                                                                                                                                                                                                                                                                                                                                |                                                                                                                                                                                |
|----------------------------------------------------------------------------------------------------------------------------------------------------------------------------------------------------------------------------------------------------------------------------------------------------------------------------------------------------------------------------------------------------------------------------------------------------------------------------------------------------------------------------------------------------------------------------------------------------|--------------------------------------------------------------------------------------------------------------------------------------------------------------------------------|
| MIS-C                                                                                                                                                                                                                                                                                                                                                                                                                                                                                                                                                                                              | Pediatric COVID                                                                                                                                                                |
| Children and adolescents under the age of 21                                                                                                                                                                                                                                                                                                                                                                                                                                                                                                                                                       | Children and adolescents under the age of 21                                                                                                                                   |
| Fever for 3 days or more, or report of one                                                                                                                                                                                                                                                                                                                                                                                                                                                                                                                                                         | Positive RT-PCR test for active SARS-CoV-2 infection                                                                                                                           |
| Clinical signs of multisystem involvement (at least <b>2</b> of the following): <ol style="list-style-type: none"> <li>1. Rash, bilateral nonpurulent conjunctivitis, or mucocutaneous inflammation signs (oral, hands, or feet)</li> <li>2. Hypotension or shock</li> <li>3. Cardiac dysfunction, pericarditis, valvulitis, or coronary abnormalities (including echocardiographic findings or elevated troponin/BNP)</li> <li>4. Evidence of coagulopathy (prolonged PT or PTT; elevated D-dimer)</li> <li>5. Acute gastrointestinal symptoms (diarrhea, vomiting, or abdominal pain)</li> </ol> | Signs of upper respiratory infection <ol style="list-style-type: none"> <li>1. Cough</li> <li>2. Shortness of breath</li> <li>3. Fever</li> <li>4. Nasal congestion</li> </ol> |
| Elevated markers of inflammation (eg, ESR, CRP, or procalcitonin)                                                                                                                                                                                                                                                                                                                                                                                                                                                                                                                                  | Does not meet MIS-C criteria                                                                                                                                                   |
| No other obvious microbial cause of inflammation, including bacterial sepsis and staphylococcal/streptococcal toxic shock syndromes                                                                                                                                                                                                                                                                                                                                                                                                                                                                |                                                                                                                                                                                |
| Evidence of SARS-CoV-2 exposure (RT-PCR, serologically positive) <p>Any of the following:</p> <ul style="list-style-type: none"> <li>Positive SARS-CoV-2 RT-PCR</li> <li>Positive serology</li> <li>Positive antigen test</li> <li>Contact with an individual with COVID-19</li> </ul>                                                                                                                                                                                                                                                                                                             |                                                                                                                                                                                |

|                                  | ped COVID 1                                                              | ped COVID 2                                                   | ped COVID 3                                             | ped COVID 4                           | ped COVID 5                    | ped COVID 6                                        | Aggregate     |
|----------------------------------|--------------------------------------------------------------------------|---------------------------------------------------------------|---------------------------------------------------------|---------------------------------------|--------------------------------|----------------------------------------------------|---------------|
| <b>Sex</b>                       | Female                                                                   | Male                                                          | Male                                                    | Female                                | Male                           | Male                                               | 4/6 Male      |
| <b>Age range (years)</b>         | 7~13                                                                     | 14~20                                                         | 0-6                                                     | 14~20                                 | 14~20                          | 7~13                                               | 7             |
| <b>Ethnicity</b>                 | Hispanic                                                                 | Hispanic                                                      | Hispanic                                                | NA                                    | Hispanic                       | NA                                                 | 4/6 Hispanic  |
| <b>Comorbidities</b>             | B-ALL                                                                    | Asthma, Anxiety                                               | Wam autoimmune hemolytic anemia, prior CMV viremia      | Pineoblastoma                         | B-ALL, Anxiety                 | Gastroschisis, Small bowel transplant (tacrolimus) | 6/6           |
| <b>WHO MIS-C Criteria</b>        | -                                                                        | -                                                             | -                                                       | -                                     | -                              | -                                                  |               |
| <b>Fever</b>                     | Yes                                                                      | Yes                                                           | Yes                                                     | No                                    | Yes                            | Yes                                                | 5/6           |
| <b>Rash</b>                      | No                                                                       | No                                                            | No                                                      | No                                    | No                             | No                                                 | 0/6           |
| <b>Conjunctivitis</b>            | No                                                                       | No                                                            | No                                                      | No                                    | No                             | No                                                 | 0/6           |
| <b>Mucocutaneous</b>             | No                                                                       | No                                                            | No                                                      | No                                    | No                             | No                                                 | 0/6           |
| <b>Extremity</b>                 | No                                                                       | No                                                            | No                                                      | No                                    | No                             | No                                                 | 0/6           |
| <b>Gastrointestinal</b>          | No                                                                       | No                                                            | No                                                      | No                                    | No                             | No                                                 | 0/6           |
| <b>Hypotension / shock</b>       | Yes                                                                      | No                                                            | No                                                      | No                                    | No                             | No                                                 | 1/6           |
| <b>Cardiac Abnormalities</b>     | None                                                                     | None                                                          | None                                                    | None                                  | None                           | None                                               | 0/6           |
| <b>Coagulopathy</b>              | NA                                                                       | ↑ PT                                                          | ↑ D-dimer<br>↑ PT<br>↑ PTT                              | ↑ D-dimer<br>↑ PTT                    | ↑ D-dimer                      | NA                                                 | 4/6           |
| <b>Inflammatory Markers</b>      | ↑ ESR<br>↑ CRP                                                           | ↑ ESR<br>↑ CRP<br>↑ PCT                                       | ↑ CRP                                                   | ↑ CRP                                 | ↑ CRP                          | ↑ CRP                                              | 6/6           |
| <b>Other microbial cause</b>     | No                                                                       | No                                                            | No                                                      | No                                    | No                             | C.difficile                                        | 1/6           |
| <b>CoV-2 PCR</b>                 | Pos                                                                      | Pos                                                           | Pos                                                     | Pos                                   | Pos                            | Pos                                                | 6/6           |
| <b>Prior Cov-2 Exposure</b>      | NA                                                                       | NA                                                            | NA                                                      | NA                                    | NA                             | NA                                                 | 0/6           |
| <b>CoV-2 Serology</b>            | NA                                                                       | +                                                             | NA                                                      | +                                     | NA                             | +                                                  | 3/3           |
| <b>Other Clinical Features</b>   | Cough, SOB, Hip pain, RAD                                                | Cough, SOB, Tachypnea, PNA + LLL consolidation, Fatigue       | Cough, Nasal congestion, RLL opacities, PNA/atelectasis | Anosmia                               | Cough, Fatigue                 | Cough, Nasal congestion                            |               |
| <b>Treatments</b>                | Cefepime, HCQ, Azithromycin, Mercaptopurine, Methotrexate, Dexamethasone | Ceftriaxone, HCQ, Azithromycin, Apixaban, Convalescent plasma | Cefepime, Azithromycin, IVIG, Sirolimus, Hydrocortisone | Bevacizumab, Temozolomide, Irinotecan | HCQ, Azithromycin, Vincristine | HCQ, Thymoglobulin, Rituximab, Hydrocortisone      |               |
| <b>Admission duration (days)</b> | 8                                                                        | 12                                                            | 9                                                       | 3                                     | 1                              | 5                                                  | Median 8 days |
| <b>Outcome</b>                   | Favorable                                                                | Favorable                                                     | Favorable                                               | Favorable                             | Favorable                      | Favorable                                          |               |
